# Supplementary material
Source: HighWire-hosted journal article supplement (http://cmajopen.ca/highwire/filestream/81136/field_highwire_adjunct_files/1/2018-0164-2-at.pdf)
Supplement: 2018-0164-2-at.pdf [file 2018-0164-2-at.pdf]

**Appendix 2 (as supplied by the authors):** UFOV-2 and UFOV-3 scores (mean ± standard deviation) and 95% confidence intervals (CIs) according to sequence and cannabis state (n=45)

| <b>UFOV-2</b> |                            |                             |                              |                             |
|---------------|----------------------------|-----------------------------|------------------------------|-----------------------------|
|               | No cannabis                | 1hr post-use                | 3hrs post-use                | 5hrs post-use               |
| Sequence 1    | 42.0±13.5<br>CI: 32.9-51.2 | 43.2±26.5<br>CI: 25.4-61.1  | 35.0±13.2<br>CI: 26.1-43.8   | 40.3±14.6<br>CI: 30.5-50.1  |
| Sequence 2    | 37.0±12.1<br>CI: 29.3-44.7 | 30.9±14.7<br>CI: 21.5-40.2  | 69.6±69.1<br>CI: 25.7-113.5  | 36.1±14.4<br>CI: 27.0-45.3  |
| Sequence 3    | 31.9±6.5<br>CI: 27.5-36.2  | 35.9±7.1<br>CI: 31.0-40.7   | 24.0±7.6<br>CI: 18.9-29.2    | 31.3±11.5<br>CI: 23.5-39.1  |
| Sequence 4    | 34.5±28.2<br>CI: 15.5-53.5 | 34.9±7.4<br>CI: 29.9-39.9   | 29.3±8.8<br>CI: 23.4-35.2    | 37.0±7.7<br>CI: 31.9-42.2   |
| <b>UFOV-3</b> |                            |                             |                              |                             |
| Sequence 1    | 73.4±27.6<br>CI: 54.8-92.0 | 73.0±40.8<br>CI: 45.5-100.4 | 60.1±23.3<br>CI: 44.4-75.8   | 81.8±54.4<br>CI: 45.2-118.3 |
| Sequence 2    | 63.9±17.8<br>CI: 52.5-75.2 | 59.0±24.8<br>CI: 43.2-74.8  | 102.2±65.9<br>CI: 60.3-144.1 | 56.1±21.9<br>CI: 42.2-70.1  |
| Sequence 3    | 60.7±25.2<br>CI: 43.7-77.6 | 73.4±28.3<br>CI: 54.4-92.4  | 50.0±20.1<br>CI: 36.4-63.5   | 62.2±24.4<br>CI: 45.8-78.7  |
| Sequence 4    | 61.8±19.6<br>CI: 48.6-75.0 | 63.1±28.7<br>CI: 37.1-89.2  | 63.1±24.1<br>CI: 46.9-79.3   | 81.5±28.9<br>CI: 62.1-100.9 |
